# Supplementary material for: Comparative performance of multiple-list estimators of key population size
Source: PubMed Central journal article supplement (PMC9345571; doi:10.1371/journal.pgph.0000155), 2022-03-10
Supplement: NIHMS1791057-supplement-S2_Table.pdf [file NIHMS1791057-supplement-S2_Table.pdf]

**Table S4.** Frequencies (percentages) of data-generating models which were correctly matched by the AIC-best log-linear models.

| $N$   | Expected<br>Pr(Encounter) | Data-generating<br>model | Lists              | AIC-best estimating model |                    |                 |                    |                 |             |
|-------|---------------------------|--------------------------|--------------------|---------------------------|--------------------|-----------------|--------------------|-----------------|-------------|
|       |                           |                          |                    | $\mathcal{M}_b$           | $\mathcal{M}_{bh}$ | $\mathcal{M}_h$ | $\mathcal{M}_{ht}$ | $\mathcal{M}_t$ |             |
| 1,000 | 0.025                     | $\mathcal{M}_b$          | 3                  | 49<br>(16.1)              | 17<br>(5.6)        | 1<br>(0.3)      | 0<br>(0.0)         | 21<br>(6.9)     |             |
|       |                           |                          | 4                  | 45<br>(14.8)              | 31<br>(10.2)       | 5<br>(1.6)      | 0<br>(0.0)         | 26<br>(8.5)     |             |
|       |                           |                          | 5                  | 57<br>(18.7)              | 27<br>(8.9)        | 0<br>(0.0)      | 0<br>(0.0)         | 26<br>(8.5)     |             |
|       |                           |                          | $\mathcal{M}_{bh}$ | 3                         | 51<br>(16.5)       | 18<br>(5.8)     | 3<br>(1.0)         | 1<br>(0.3)      | 19<br>(6.1) |
|       |                           |                          |                    | 4                         | 57<br>(18.4)       | 26<br>(8.4)     | 8<br>(2.6)         | 0<br>(0.0)      | 26<br>(8.4) |
|       |                           |                          |                    | 5                         | 53<br>(17.1)       | 25<br>(8.1)     | 3<br>(1.0)         | 0<br>(0.0)      | 20<br>(6.5) |
|       |                           |                          | $\mathcal{M}_h$    | 3                         | 56<br>(16.3)       | 19<br>(5.5)     | 16<br>(4.7)        | 5<br>(1.5)      | 14<br>(4.1) |
|       |                           |                          |                    | 4                         | 46<br>(13.4)       | 38<br>(11.1)    | 12<br>(3.5)        | 0<br>(0.0)      | 25<br>(7.3) |
|       |                           |                          |                    | 5                         | 37<br>(10.8)       | 35<br>(10.2)    | 15<br>(4.4)        | 4<br>(1.2)      | 21<br>(6.1) |
|       |                           | $\mathcal{M}_{ht}$       | 3                  | 62<br>(19.0)              | 26<br>(8.0)        | 3<br>(0.9)      | 0<br>(0.0)         | 15<br>(4.6)     |             |
|       |                           |                          | 4                  | 48<br>(14.7)              | 40<br>(12.3)       | 2<br>(0.6)      | 0<br>(0.0)         | 25<br>(7.7)     |             |
|       |                           |                          | 5                  | 46<br>(14.1)              | 32<br>(9.8)        | 1<br>(0.3)      | 0<br>(0.0)         | 26<br>(8.0)     |             |
|       |                           | $\mathcal{M}_t$          | 3                  | 56<br>(5.1)               | 103<br>(9.4)       | 0<br>(0.0)      | 4<br>(0.4)         | 182<br>(16.7)   |             |
|       |                           |                          | 4                  | 16<br>(1.5)               | 49<br>(4.5)        | 0<br>(0.0)      | 13<br>(1.2)        | 289<br>(26.5)   |             |
|       |                           |                          | 5                  | 7<br>(0.6)                | 26<br>(2.4)        | 0<br>(0.0)      | 4<br>(0.4)         | 342<br>(31.3)   |             |
|       |                           | 0.050                    | $\mathcal{M}_b$    | 3                         | 45<br>(14.2)       | 16<br>(5.0)     | 11<br>(3.5)        | 0<br>(0.0)      | 16<br>(5.0) |
|       |                           |                          |                    | 4                         | 41<br>(12.9)       | 31<br>(9.8)     | 9<br>(2.8)         | 3<br>(0.9)      | 27<br>(8.5) |
|       |                           |                          |                    | 5                         | 66<br>(20.8)       | 28<br>(8.8)     | 1<br>(0.3)         | 1<br>(0.3)      | 22<br>(6.9) |
|       |                           |                          | $\mathcal{M}_{bh}$ | 3                         | 62<br>(14.2)       | 16<br>(3.7)     | 24<br>(5.5)        | 4<br>(0.9)      | 24<br>(5.5) |
|       |                           |                          |                    | 4                         | 70<br>(16.1)       | 31<br>(7.1)     | 17<br>(3.9)        | 4<br>(0.9)      | 22<br>(5.0) |

*Continued on next page*

Table S4 continued...

| $N$ | Expected<br>Pr(Encounter) | Data-generating<br>model | Lists | AIC-best estimating model |                    |                 |                    |                 |
|-----|---------------------------|--------------------------|-------|---------------------------|--------------------|-----------------|--------------------|-----------------|
|     |                           |                          |       | $\mathcal{M}_b$           | $\mathcal{M}_{bh}$ | $\mathcal{M}_h$ | $\mathcal{M}_{ht}$ | $\mathcal{M}_t$ |
|     |                           |                          | 5     | 76<br>(17.4)              | 32<br>(7.3)        | 27<br>(6.2)     | 6<br>(1.4)         | 21<br>(4.8)     |
|     |                           | $\mathcal{M}_h$          | 3     | 43<br>(8.9)               | 19<br>(3.9)        | 39<br>(8.0)     | 3<br>(0.6)         | 26<br>(5.4)     |
|     |                           |                          | 4     | 48<br>(9.9)               | 27<br>(5.6)        | 70<br>(14.4)    | 10<br>(2.1)        | 20<br>(4.1)     |
|     |                           |                          | 5     | 48<br>(9.9)               | 28<br>(5.8)        | 71<br>(14.6)    | 7<br>(1.4)         | 26<br>(5.4)     |
|     |                           | $\mathcal{M}_{ht}$       | 3     | 45<br>(11.8)              | 21<br>(5.5)        | 20<br>(5.3)     | 6<br>(1.6)         | 17<br>(4.5)     |
|     |                           |                          | 4     | 45<br>(11.8)              | 34<br>(8.9)        | 21<br>(5.5)     | 2<br>(0.5)         | 19<br>(5.0)     |
|     |                           |                          | 5     | 36<br>(9.5)               | 32<br>(8.4)        | 66<br>(17.4)    | 5<br>(1.3)         | 11<br>(2.9)     |
|     |                           | $\mathcal{M}_t$          | 3     | 36<br>(3.1)               | 95<br>(8.2)        | 0<br>(0.0)      | 20<br>(1.7)        | 226<br>(19.4)   |
|     |                           |                          | 4     | 8<br>(0.7)                | 35<br>(3.0)        | 0<br>(0.0)      | 27<br>(2.3)        | 321<br>(27.6)   |
|     |                           |                          | 5     | 2<br>(0.2)                | 12<br>(1.0)        | 0<br>(0.0)      | 38<br>(3.3)        | 345<br>(29.6)   |
|     | 0.100                     | $\mathcal{M}_b$          | 3     | 93<br>(14.5)              | 19<br>(3.0)        | 13<br>(2.0)     | 1<br>(0.2)         | 19<br>(3.0)     |
|     |                           |                          | 4     | 105<br>(16.4)             | 34<br>(5.3)        | 53<br>(8.3)     | 5<br>(0.8)         | 35<br>(5.5)     |
|     |                           |                          | 5     | 149<br>(23.2)             | 47<br>(7.3)        | 26<br>(4.0)     | 13<br>(2.0)        | 30<br>(4.7)     |
|     |                           | $\mathcal{M}_{bh}$       | 3     | 128<br>(15.0)             | 25<br>(2.9)        | 44<br>(5.2)     | 14<br>(1.6)        | 24<br>(2.8)     |
|     |                           |                          | 4     | 165<br>(19.4)             | 29<br>(3.4)        | 34<br>(4.0)     | 19<br>(2.2)        | 28<br>(3.3)     |
|     |                           |                          | 5     | 222<br>(26.1)             | 33<br>(3.9)        | 37<br>(4.3)     | 17<br>(2.0)        | 32<br>(3.8)     |
|     |                           | $\mathcal{M}_h$          | 3     | 34<br>(4.6)               | 15<br>(2.0)        | 97<br>(13.1)    | 10<br>(1.3)        | 24<br>(3.2)     |
|     |                           |                          | 4     | 36<br>(4.9)               | 21<br>(2.8)        | 162<br>(21.8)   | 12<br>(1.6)        | 15<br>(2.0)     |
|     |                           |                          | 5     | 21<br>(2.8)               | 15<br>(2.0)        | 251<br>(33.8)   | 21<br>(2.8)        | 8<br>(1.1)      |
|     |                           | $\mathcal{M}_{ht}$       | 3     | 48<br>(10.5)              | 21<br>(4.6)        | 75<br>(16.4)    | 6<br>(1.3)         | 14<br>(3.1)     |
|     |                           |                          | 4     | 40<br>(8.8)               | 29<br>(6.4)        | 59<br>(12.9)    | 4<br>(0.9)         | 17<br>(3.7)     |

Continued on next page

Table S4 continued...

| $N$ | Expected<br>Pr(Encounter) | Data-generating<br>model | Lists | AIC-best estimating model |                    |                 |                    |                 |
|-----|---------------------------|--------------------------|-------|---------------------------|--------------------|-----------------|--------------------|-----------------|
|     |                           |                          |       | $\mathcal{M}_b$           | $\mathcal{M}_{bh}$ | $\mathcal{M}_h$ | $\mathcal{M}_{ht}$ | $\mathcal{M}_t$ |
|     |                           |                          | 5     | 43<br>(9.4)               | 27<br>(5.9)        | 49<br>(10.7)    | 6<br>(1.3)         | 18<br>(3.9)     |
|     |                           | $\mathcal{M}_t$          | 3     | 27<br>(2.3)               | 65<br>(5.5)        | 0<br>(0.0)      | 28<br>(2.4)        | 269<br>(22.8)   |
|     |                           |                          | 4     | 2<br>(0.2)                | 13<br>(1.1)        | 0<br>(0.0)      | 52<br>(4.4)        | 328<br>(27.8)   |
|     |                           |                          | 5     | 0<br>(0.0)                | 4<br>(0.3)         | 0<br>(0.0)      | 46<br>(3.9)        | 347<br>(29.4)   |
|     | 0.150                     | $\mathcal{M}_b$          | 3     | 142<br>(15.1)             | 22<br>(2.3)        | 37<br>(3.9)     | 9<br>(1.0)         | 27<br>(2.9)     |
|     |                           |                          | 4     | 228<br>(24.3)             | 36<br>(3.8)        | 29<br>(3.1)     | 10<br>(1.1)        | 27<br>(2.9)     |
|     |                           |                          | 5     | 276<br>(29.4)             | 47<br>(5.0)        | 9<br>(1.0)      | 7<br>(0.7)         | 33<br>(3.5)     |
|     |                           | $\mathcal{M}_{bh}$       | 3     | 213<br>(19.0)             | 28<br>(2.5)        | 27<br>(2.4)     | 31<br>(2.8)        | 41<br>(3.6)     |
|     |                           |                          | 4     | 229<br>(20.4)             | 42<br>(3.7)        | 22<br>(2.0)     | 57<br>(5.1)        | 38<br>(3.4)     |
|     |                           |                          | 5     | 224<br>(19.9)             | 53<br>(4.7)        | 12<br>(1.1)     | 82<br>(7.3)        | 25<br>(2.2)     |
|     |                           | $\mathcal{M}_h$          | 3     | 27<br>(2.7)               | 16<br>(1.6)        | 157<br>(15.9)   | 24<br>(2.4)        | 11<br>(1.1)     |
|     |                           |                          | 4     | 13<br>(1.3)               | 6<br>(0.6)         | 290<br>(29.4)   | 37<br>(3.8)        | 4<br>(0.4)      |
|     |                           |                          | 5     | 2<br>(0.2)                | 1<br>(0.1)         | 362<br>(36.8)   | 35<br>(3.6)        | 0<br>(0.0)      |
|     |                           | $\mathcal{M}_{ht}$       | 3     | 43<br>(11.1)              | 13<br>(3.4)        | 55<br>(14.2)    | 5<br>(1.3)         | 15<br>(3.9)     |
|     |                           |                          | 4     | 36<br>(9.3)               | 17<br>(4.4)        | 50<br>(12.9)    | 4<br>(1.0)         | 14<br>(3.6)     |
|     |                           |                          | 5     | 38<br>(9.8)               | 15<br>(3.9)        | 65<br>(16.8)    | 2<br>(0.5)         | 15<br>(3.9)     |
|     |                           | $\mathcal{M}_t$          | 3     | 14<br>(1.2)               | 50<br>(4.2)        | 0<br>(0.0)      | 47<br>(4.0)        | 283<br>(23.8)   |
|     |                           |                          | 4     | 1<br>(0.1)                | 11<br>(0.9)        | 0<br>(0.0)      | 72<br>(6.1)        | 313<br>(26.3)   |
|     |                           |                          | 5     | 0<br>(0.0)                | 1<br>(0.1)         | 0<br>(0.0)      | 60<br>(5.0)        | 337<br>(28.3)   |
|     | 0.200                     | $\mathcal{M}_b$          | 3     | 206<br>(18.6)             | 32<br>(2.9)        | 27<br>(2.4)     | 24<br>(2.2)        | 33<br>(3.0)     |
|     |                           |                          | 4     | 286<br>(25.8)             | 42<br>(3.8)        | 5<br>(0.5)      | 13<br>(1.2)        | 41<br>(3.7)     |

*Continued on next page*

Table S4 continued...

| $N$    | Expected<br>Pr(Encounter) | Data-generating<br>model | Lists | AIC-best estimating model |                    |                 |                    |                 |
|--------|---------------------------|--------------------------|-------|---------------------------|--------------------|-----------------|--------------------|-----------------|
|        |                           |                          |       | $\mathcal{M}_b$           | $\mathcal{M}_{bh}$ | $\mathcal{M}_h$ | $\mathcal{M}_{ht}$ | $\mathcal{M}_t$ |
|        |                           |                          | 5     | 309<br>(27.9)             | 50<br>(4.5)        | 0<br>(0.0)      | 9<br>(0.8)         | 30<br>(2.7)     |
|        |                           | $\mathcal{M}_{bh}$       | 3     | 233<br>(19.5)             | 28<br>(2.3)        | 4<br>(0.3)      | 68<br>(5.7)        | 59<br>(4.9)     |
|        |                           |                          | 4     | 201<br>(16.9)             | 43<br>(3.6)        | 1<br>(0.1)      | 128<br>(10.7)      | 27<br>(2.3)     |
|        |                           |                          | 5     | 138<br>(11.6)             | 41<br>(3.4)        | 0<br>(0.0)      | 210<br>(17.6)      | 11<br>(0.9)     |
|        |                           | $\mathcal{M}_h$          | 3     | 17<br>(1.5)               | 8<br>(0.7)         | 264<br>(23.0)   | 59<br>(5.1)        | 1<br>(0.1)      |
|        |                           |                          | 4     | 1<br>(0.1)                | 1<br>(0.1)         | 349<br>(30.4)   | 48<br>(4.2)        | 0<br>(0.0)      |
|        |                           |                          | 5     | 0<br>(0.0)                | 0<br>(0.0)         | 367<br>(32.0)   | 33<br>(2.9)        | 0<br>(0.0)      |
|        |                           | $\mathcal{M}_{ht}$       | 3     | 47<br>(10.1)              | 23<br>(4.9)        | 54<br>(11.6)    | 13<br>(2.8)        | 24<br>(5.2)     |
|        |                           |                          | 4     | 50<br>(10.8)              | 26<br>(5.6)        | 48<br>(10.3)    | 7<br>(1.5)         | 23<br>(4.9)     |
|        |                           |                          | 5     | 42<br>(9.0)               | 24<br>(5.2)        | 46<br>(9.9)     | 9<br>(1.9)         | 29<br>(6.2)     |
|        |                           | $\mathcal{M}_t$          | 3     | 12<br>(1.0)               | 46<br>(3.9)        | 1<br>(0.1)      | 45<br>(3.8)        | 291<br>(24.5)   |
|        |                           |                          | 4     | 0<br>(0.0)                | 4<br>(0.3)         | 0<br>(0.0)      | 56<br>(4.7)        | 337<br>(28.3)   |
|        |                           |                          | 5     | 0<br>(0.0)                | 0<br>(0.0)         | 0<br>(0.0)      | 64<br>(5.4)        | 333<br>(28.0)   |
| 20,000 | 0.025                     | $\mathcal{M}_b$          | 3     | 67<br>(14.5)              | 13<br>(2.8)        | 29<br>(6.3)     | 3<br>(0.7)         | 19<br>(4.1)     |
|        |                           |                          | 4     | 74<br>(16.1)              | 31<br>(6.7)        | 12<br>(2.6)     | 2<br>(0.4)         | 21<br>(4.6)     |
|        |                           |                          | 5     | 96<br>(20.8)              | 40<br>(8.7)        | 29<br>(6.3)     | 1<br>(0.2)         | 24<br>(5.2)     |
|        |                           | $\mathcal{M}_{bh}$       | 3     | 74<br>(11.6)              | 24<br>(3.8)        | 30<br>(4.7)     | 7<br>(1.1)         | 17<br>(2.7)     |
|        |                           |                          | 4     | 94<br>(14.7)              | 32<br>(5.0)        | 57<br>(8.9)     | 10<br>(1.6)        | 23<br>(3.6)     |
|        |                           |                          | 5     | 142<br>(22.2)             | 35<br>(5.5)        | 56<br>(8.8)     | 18<br>(2.8)        | 21<br>(3.3)     |
|        |                           | $\mathcal{M}_h$          | 3     | 37<br>(7.2)               | 13<br>(2.5)        | 77<br>(14.9)    | 3<br>(0.6)         | 14<br>(2.7)     |
|        |                           |                          | 4     | 50<br>(9.7)               | 17<br>(3.3)        | 79<br>(15.3)    | 5<br>(1.0)         | 14<br>(2.7)     |

*Continued on next page*

Table S4 continued...

| $N$ | Expected<br>Pr(Encounter) | Data-generating<br>model | Lists | AIC-best estimating model |                    |                 |                    |                 |
|-----|---------------------------|--------------------------|-------|---------------------------|--------------------|-----------------|--------------------|-----------------|
|     |                           |                          |       | $\mathcal{M}_b$           | $\mathcal{M}_{bh}$ | $\mathcal{M}_h$ | $\mathcal{M}_{ht}$ | $\mathcal{M}_t$ |
|     |                           |                          | 5     | 37<br>(7.2)               | 12<br>(2.3)        | 137<br>(26.5)   | 9<br>(1.7)         | 13<br>(2.5)     |
|     |                           | $\mathcal{M}_{ht}$       | 3     | 39<br>(8.7)               | 21<br>(4.7)        | 19<br>(4.2)     | 4<br>(0.9)         | 25<br>(5.6)     |
|     |                           |                          | 4     | 45<br>(10.0)              | 20<br>(4.5)        | 108<br>(24.1)   | 10<br>(2.2)        | 8<br>(1.8)      |
|     |                           |                          | 5     | 47<br>(10.5)              | 22<br>(4.9)        | 60<br>(13.4)    | 8<br>(1.8)         | 13<br>(2.9)     |
|     |                           | $\mathcal{M}_t$          | 3     | 14<br>(1.2)               | 66<br>(5.5)        | 0<br>(0.0)      | 13<br>(1.1)        | 306<br>(25.5)   |
|     |                           |                          | 4     | 0<br>(0.0)                | 14<br>(1.2)        | 0<br>(0.0)      | 51<br>(4.3)        | 335<br>(27.9)   |
|     |                           |                          | 5     | 0<br>(0.0)                | 0<br>(0.0)         | 0<br>(0.0)      | 66<br>(5.5)        | 334<br>(27.9)   |
|     | 0.050                     | $\mathcal{M}_b$          | 3     | 134<br>(15.8)             | 23<br>(2.7)        | 14<br>(1.7)     | 5<br>(0.6)         | 24<br>(2.8)     |
|     |                           |                          | 4     | 186<br>(21.9)             | 41<br>(4.8)        | 31<br>(3.7)     | 11<br>(1.3)        | 19<br>(2.2)     |
|     |                           |                          | 5     | 259<br>(30.5)             | 58<br>(6.8)        | 10<br>(1.2)     | 9<br>(1.1)         | 24<br>(2.8)     |
|     |                           | $\mathcal{M}_{bh}$       | 3     | 204<br>(18.6)             | 23<br>(2.1)        | 43<br>(3.9)     | 26<br>(2.4)        | 19<br>(1.7)     |
|     |                           |                          | 4     | 240<br>(21.9)             | 46<br>(4.2)        | 21<br>(1.9)     | 50<br>(4.6)        | 27<br>(2.5)     |
|     |                           |                          | 5     | 236<br>(21.5)             | 49<br>(4.5)        | 5<br>(0.5)      | 91<br>(8.3)        | 17<br>(1.5)     |
|     |                           | $\mathcal{M}_h$          | 3     | 27<br>(2.9)               | 13<br>(1.4)        | 133<br>(14.4)   | 15<br>(1.6)        | 21<br>(2.3)     |
|     |                           |                          | 4     | 23<br>(2.5)               | 8<br>(0.9)         | 256<br>(27.7)   | 34<br>(3.7)        | 7<br>(0.8)      |
|     |                           |                          | 5     | 3<br>(0.3)                | 1<br>(0.1)         | 346<br>(37.4)   | 35<br>(3.8)        | 2<br>(0.2)      |
|     |                           | $\mathcal{M}_{ht}$       | 3     | 50<br>(11.6)              | 19<br>(4.4)        | 47<br>(10.9)    | 9<br>(2.1)         | 17<br>(3.9)     |
|     |                           |                          | 4     | 51<br>(11.8)              | 19<br>(4.4)        | 45<br>(10.4)    | 7<br>(1.6)         | 17<br>(3.9)     |
|     |                           |                          | 5     | 55<br>(12.7)              | 31<br>(7.2)        | 42<br>(9.7)     | 3<br>(0.7)         | 20<br>(4.6)     |
|     |                           | $\mathcal{M}_t$          | 3     | 2<br>(0.2)                | 40<br>(3.3)        | 0<br>(0.0)      | 33<br>(2.8)        | 324<br>(27.0)   |
|     |                           |                          | 4     | 0<br>(0.0)                | 2<br>(0.2)         | 0<br>(0.0)      | 68<br>(5.7)        | 330<br>(27.5)   |

*Continued on next page*

Table S4 continued...

| $N$ | Expected<br>Pr(Encounter) | Data-generating<br>model | Lists | AIC-best estimating model |                    |                 |                    |                 |
|-----|---------------------------|--------------------------|-------|---------------------------|--------------------|-----------------|--------------------|-----------------|
|     |                           |                          |       | $\mathcal{M}_b$           | $\mathcal{M}_{bh}$ | $\mathcal{M}_h$ | $\mathcal{M}_{ht}$ | $\mathcal{M}_t$ |
|     |                           |                          | 5     | 0<br>(0.0)                | 0<br>(0.0)         | 0<br>(0.0)      | 64<br>(5.3)        | 336<br>(28.0)   |
|     | 0.100                     | $\mathcal{M}_b$          | 3     | 292<br>(24.6)             | 32<br>(2.7)        | 1<br>(0.1)      | 31<br>(2.6)        | 31<br>(2.6)     |
|     |                           |                          | 4     | 293<br>(24.7)             | 56<br>(4.7)        | 0<br>(0.0)      | 18<br>(1.5)        | 32<br>(2.7)     |
|     |                           |                          | 5     | 303<br>(25.5)             | 64<br>(5.4)        | 0<br>(0.0)      | 9<br>(0.8)         | 24<br>(2.0)     |
|     |                           | $\mathcal{M}_{bh}$       | 3     | 183<br>(15.2)             | 16<br>(1.3)        | 0<br>(0.0)      | 144<br>(12.0)      | 57<br>(4.8)     |
|     |                           |                          | 4     | 106<br>(8.8)              | 19<br>(1.6)        | 0<br>(0.0)      | 265<br>(22.1)      | 10<br>(0.8)     |
|     |                           |                          | 5     | 40<br>(3.3)               | 6<br>(0.5)         | 0<br>(0.0)      | 354<br>(29.5)      | 0<br>(0.0)      |
|     |                           | $\mathcal{M}_h$          | 3     | 3<br>(0.3)                | 3<br>(0.3)         | 345<br>(29.0)   | 38<br>(3.2)        | 1<br>(0.1)      |
|     |                           |                          | 4     | 0<br>(0.0)                | 0<br>(0.0)         | 356<br>(29.9)   | 44<br>(3.7)        | 0<br>(0.0)      |
|     |                           |                          | 5     | 0<br>(0.0)                | 0<br>(0.0)         | 364<br>(30.6)   | 36<br>(3.0)        | 0<br>(0.0)      |
|     |                           | $\mathcal{M}_{ht}$       | 3     | 39<br>(8.9)               | 17<br>(3.9)        | 65<br>(14.8)    | 7<br>(1.6)         | 13<br>(3.0)     |
|     |                           |                          | 4     | 40<br>(9.1)               | 23<br>(5.2)        | 64<br>(14.6)    | 3<br>(0.7)         | 17<br>(3.9)     |
|     |                           |                          | 5     | 40<br>(9.1)               | 27<br>(6.2)        | 66<br>(15.0)    | 4<br>(0.9)         | 14<br>(3.2)     |
|     |                           | $\mathcal{M}_t$          | 3     | 0<br>(0.0)                | 20<br>(1.7)        | 0<br>(0.0)      | 61<br>(5.1)        | 318<br>(26.5)   |
|     |                           |                          | 4     | 0<br>(0.0)                | 0<br>(0.0)         | 0<br>(0.0)      | 59<br>(4.9)        | 341<br>(28.4)   |
|     |                           |                          | 5     | 0<br>(0.0)                | 0<br>(0.0)         | 0<br>(0.0)      | 60<br>(5.0)        | 340<br>(28.4)   |
|     | 0.150                     | $\mathcal{M}_b$          | 3     | 281<br>(23.4)             | 39<br>(3.2)        | 0<br>(0.0)      | 31<br>(2.6)        | 49<br>(4.1)     |
|     |                           |                          | 4     | 306<br>(25.5)             | 67<br>(5.6)        | 0<br>(0.0)      | 8<br>(0.7)         | 19<br>(1.6)     |
|     |                           |                          | 5     | 320<br>(26.7)             | 72<br>(6.0)        | 0<br>(0.0)      | 3<br>(0.2)         | 5<br>(0.4)      |
|     |                           | $\mathcal{M}_{bh}$       | 3     | 93<br>(7.8)               | 14<br>(1.2)        | 0<br>(0.0)      | 281<br>(23.4)      | 12<br>(1.0)     |
|     |                           |                          | 4     | 15<br>(1.2)               | 5<br>(0.4)         | 0<br>(0.0)      | 380<br>(31.7)      | 0<br>(0.0)      |

*Continued on next page*

Table S4 continued...

| $N$ | Expected<br>Pr(Encounter) | Data-generating<br>model | Lists | AIC-best estimating model |                    |                 |                    |                 |
|-----|---------------------------|--------------------------|-------|---------------------------|--------------------|-----------------|--------------------|-----------------|
|     |                           |                          |       | $\mathcal{M}_b$           | $\mathcal{M}_{bh}$ | $\mathcal{M}_h$ | $\mathcal{M}_{ht}$ | $\mathcal{M}_t$ |
|     |                           |                          | 5     | 3<br>(0.2)                | 0<br>(0.0)         | 0<br>(0.0)      | 397<br>(33.1)      | 0<br>(0.0)      |
|     |                           | $\mathcal{M}_h$          | 3     | 0<br>(0.0)                | 0<br>(0.0)         | 354<br>(29.5)   | 46<br>(3.8)        | 0<br>(0.0)      |
|     |                           |                          | 4     | 0<br>(0.0)                | 0<br>(0.0)         | 373<br>(31.1)   | 27<br>(2.2)        | 0<br>(0.0)      |
|     |                           |                          | 5     | 0<br>(0.0)                | 0<br>(0.0)         | 381<br>(31.8)   | 19<br>(1.6)        | 0<br>(0.0)      |
|     |                           | $\mathcal{M}_{ht}$       | 3     | 38<br>(8.4)               | 21<br>(4.7)        | 54<br>(12.0)    | 9<br>(2.0)         | 16<br>(3.5)     |
|     |                           |                          | 4     | 53<br>(11.8)              | 28<br>(6.2)        | 49<br>(10.9)    | 3<br>(0.7)         | 28<br>(6.2)     |
|     |                           |                          | 5     | 46<br>(10.2)              | 22<br>(4.9)        | 57<br>(12.6)    | 5<br>(1.1)         | 22<br>(4.9)     |
|     |                           | $\mathcal{M}_t$          | 3     | 1<br>(0.1)                | 18<br>(1.5)        | 0<br>(0.0)      | 55<br>(4.6)        | 326<br>(27.2)   |
|     |                           |                          | 4     | 0<br>(0.0)                | 1<br>(0.1)         | 0<br>(0.0)      | 62<br>(5.2)        | 337<br>(28.1)   |
|     |                           |                          | 5     | 0<br>(0.0)                | 1<br>(0.1)         | 0<br>(0.0)      | 62<br>(5.2)        | 337<br>(28.1)   |
|     | 0.200                     | $\mathcal{M}_b$          | 3     | 295<br>(24.6)             | 55<br>(4.6)        | 0<br>(0.0)      | 14<br>(1.2)        | 36<br>(3.0)     |
|     |                           |                          | 4     | 328<br>(27.3)             | 65<br>(5.4)        | 0<br>(0.0)      | 0<br>(0.0)         | 7<br>(0.6)      |
|     |                           |                          | 5     | 334<br>(27.8)             | 66<br>(5.5)        | 0<br>(0.0)      | 0<br>(0.0)         | 0<br>(0.0)      |
|     |                           | $\mathcal{M}_{bh}$       | 3     | 23<br>(1.9)               | 10<br>(0.8)        | 0<br>(0.0)      | 367<br>(30.6)      | 0<br>(0.0)      |
|     |                           |                          | 4     | 0<br>(0.0)                | 0<br>(0.0)         | 0<br>(0.0)      | 400<br>(33.3)      | 0<br>(0.0)      |
|     |                           |                          | 5     | 0<br>(0.0)                | 0<br>(0.0)         | 0<br>(0.0)      | 400<br>(33.3)      | 0<br>(0.0)      |
|     |                           | $\mathcal{M}_h$          | 3     | 0<br>(0.0)                | 0<br>(0.0)         | 348<br>(29.0)   | 52<br>(4.3)        | 0<br>(0.0)      |
|     |                           |                          | 4     | 0<br>(0.0)                | 0<br>(0.0)         | 352<br>(29.3)   | 48<br>(4.0)        | 0<br>(0.0)      |
|     |                           |                          | 5     | 0<br>(0.0)                | 0<br>(0.0)         | 367<br>(30.6)   | 33<br>(2.8)        | 0<br>(0.0)      |
|     |                           | $\mathcal{M}_{ht}$       | 3     | 35<br>(8.4)               | 20<br>(4.8)        | 54<br>(13.0)    | 4<br>(1.0)         | 19<br>(4.6)     |
|     |                           |                          | 4     | 39<br>(9.4)               | 22<br>(5.3)        | 55<br>(13.3)    | 7<br>(1.7)         | 14<br>(3.4)     |

*Continued on next page*

Table S4 continued...

| $N$ | Expected<br>Pr(Encounter) | Data-generating<br>model | Lists | AIC-best estimating model |                    |                 |                    |                 |
|-----|---------------------------|--------------------------|-------|---------------------------|--------------------|-----------------|--------------------|-----------------|
|     |                           |                          |       | $\mathcal{M}_b$           | $\mathcal{M}_{bh}$ | $\mathcal{M}_h$ | $\mathcal{M}_{ht}$ | $\mathcal{M}_t$ |
|     |                           |                          | 5     | 47<br>(11.3)              | 23<br>(5.5)        | 56<br>(13.5)    | 7<br>(1.7)         | 13<br>(3.1)     |
|     |                           | $\mathcal{M}_t$          | 3     | 2<br>(0.2)                | 5<br>(0.4)         | 0<br>(0.0)      | 63<br>(5.3)        | 329<br>(27.4)   |
|     |                           |                          | 4     | 0<br>(0.0)                | 0<br>(0.0)         | 0<br>(0.0)      | 69<br>(5.8)        | 331<br>(27.6)   |
|     |                           |                          | 5     | 0<br>(0.0)                | 0<br>(0.0)         | 0<br>(0.0)      | 68<br>(5.7)        | 332<br>(27.7)   |
